# Supplementary material for: Rice Transcription Factor OsWRKY55 Is Involved in the Drought Response and Regulation of Plant Growth
Source: MDPI journal article supplement (doi:10.3390/ijms22094337), 2021-04-21
Supplement: s1 [file s1]

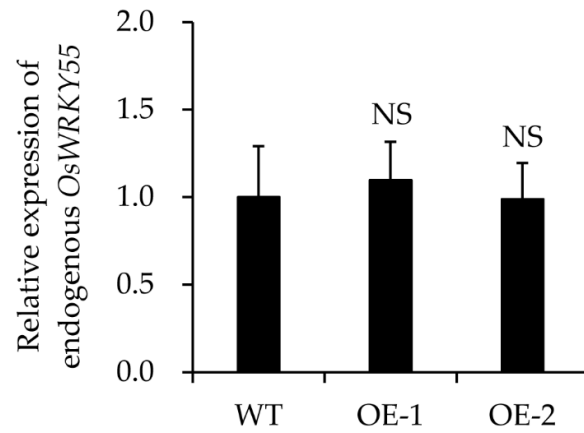

**Figure S1.** Endogenous *OsWRKY55* mRNA level in each genotype was analyzed by quantitative reverse transcription PCR (qRT-PCR). The rice *OsActin* gene was used as the internal control. Values shown are means  $\pm$  SD ( $n = 3$ ), Student's *t*-test. WT, wild-type; OE, *OsWRKY55*-overexpressing line; NS, not significant.

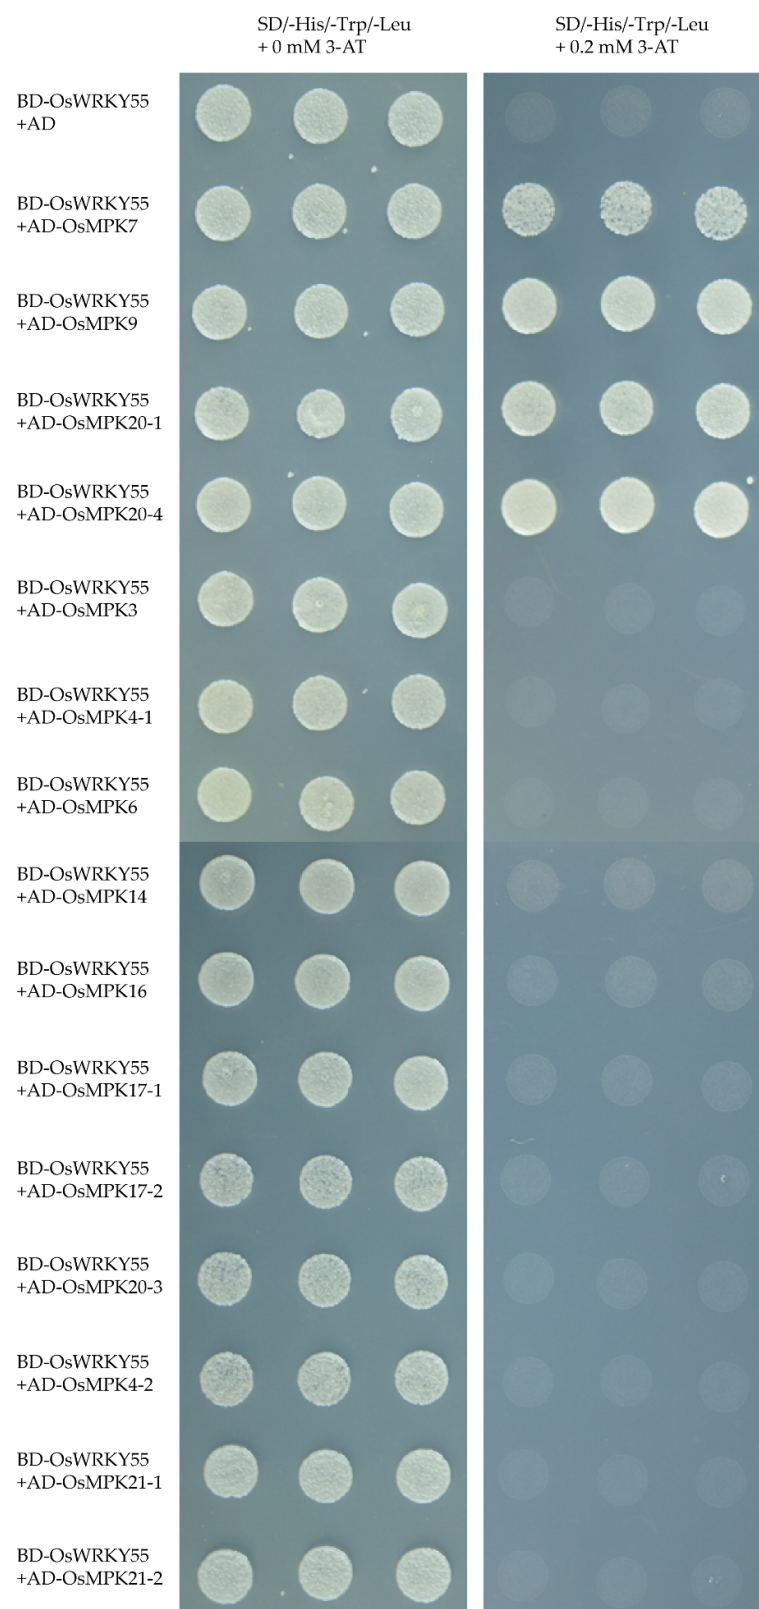

**Figure S2.** The interactions between OsWRKY55 and 15 OsMPKs in yeast two-hybrid assays. Growth phenotypes of yeast cells on selective media plates (SD/-Trp-Leu-His) containing 0 or 0.2 mM 3-amino-1, 2, 4-triazole (3-AT).

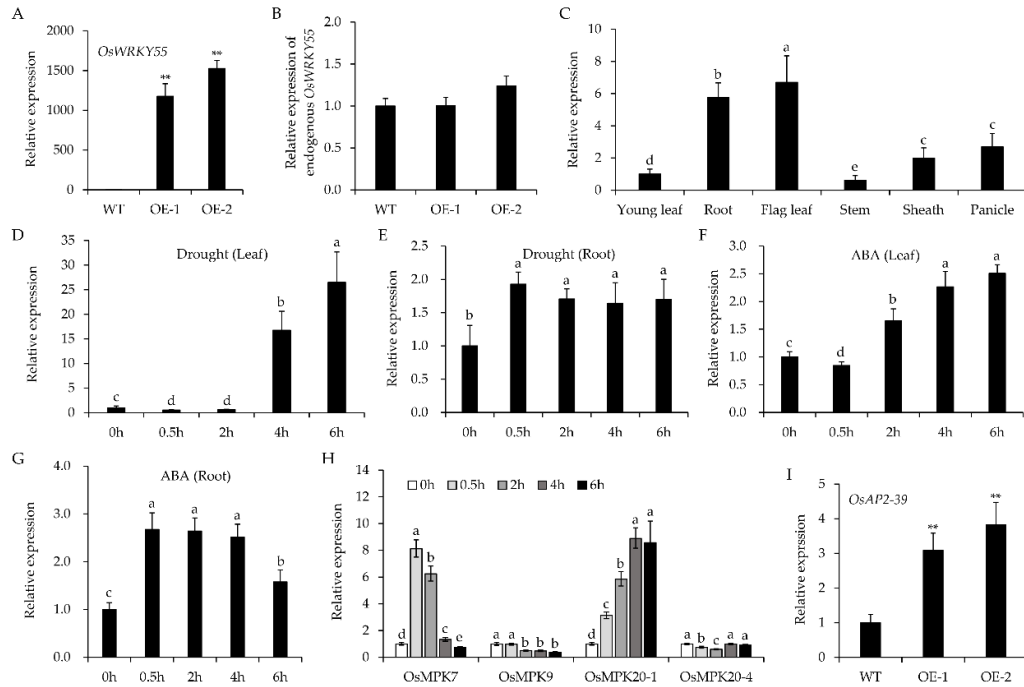

**Figure S3.** All quantitative reverse transcription PCR (qRT-PCR) in this study used the gene *Ubiquitin5* as the inner control. **(A)** The *OsWRKY55* mRNA level in each genotype was analyzed by qRT-PCR. **(B)** Endogenous *OsWRKY55* mRNA level in each genotype was analyzed. **(C)** Expression profile of *OsWRKY55* in various rice tissues of the wild-type (WT). **(D and E)** Relative expression of *OsWRKY55* in leaves (D) and roots (E) after drought treatment (dehydration). **(F and G)** Relative expression of *OsWRKY55* in leaves (F) and roots (G) after treatment with 100  $\mu$ M of the phytohormone abscisic acid (ABA). **(H)** Relative expressions of *OsMPK7*, *OsMPK9*, *OsMPK20-1*, and *OsMPK20-4* after drought treatment (dehydration). **(I)** Relative expression of the *OsAP2-39* gene in WT plants and transgenic lines overexpressing *OsWRKY55* (OE-1 and OE-2). Values shown are means  $\pm$  SD ( $n = 3$ ), \*\*  $P < 0.01$  (Student's  $t$ -test). Different letters above the bars indicate significant differences ( $P < 0.05$ ).

**Table S1.** Primers used in this study.

| Gene              | Primer sequence                          | Experiments |
|-------------------|------------------------------------------|-------------|
| <i>OsWRKY55</i>   | F: GCCGAGTCCGCATCAATC                    | qRT-PCR     |
|                   | R: TTCTCGCCGTACTTCCTCCA                  | qRT-PCR     |
|                   | F: AGGAGGACCTGCATATGATGTCTCCTGTGCCGAGTCC | Cloning     |
|                   | R: GCAGGTCGACGGATCCTTACAAAAAATGGAAGAATC  | Cloning     |
|                   | F: AAAAGAGATCGAATTCATGTCTCCTGTGCCGAGTCC  | Cloning     |
|                   | R: GCAGGTCGACGGATCCTTACAAAAAATGGAAGAATC  | Cloning     |
|                   | F: CGGAGCTAGCTCTAGAATGTCTCCTGTGCCGAGTCC  | Cloning     |
|                   | R: TGCTCACCATGGATCCCAAAAAATGGAAGAATCTGA  | Cloning     |
| <i>OsAP2-39</i>   | F: GATCTGAGCCTCGGGATGTCGG                | qRT-PCR     |
|                   | R: AGGCGAGCTACCTCCTTCTTGACG              | qRT-PCR     |
|                   | F: CGGTATCGATAAGCTTTTGTGCGACAGACCAACTAG  | Cloning     |
|                   | R: TAGAACTAGTGGATCCGTCCGTTCTTGTTCGGGTCG  | Cloning     |
|                   | F: TGAAAAGCTTGAATTCTTGTGCGACAGACCAACTAG  | Cloning     |
|                   | R: GAGCACATGCCTCGAGGTCCGTTCTTGTTCGGGTCG  | Cloning     |
| <i>OsActin</i>    | F: CATTGGTGCTGAGCGTTTCC                  | qRT-PCR     |
|                   | R: CTCCTTGCTCATCCTGTCAGC                 | qRT-PCR     |
| <i>Ubiquitin5</i> | F: ACCACTTCGACCGCCACTACT                 | qRT-PCR     |
|                   | R: ACGCCTAAGCCTGCTGGTT                   | qRT-PCR     |
| <i>OsMPK3</i>     | F: GGAGGCCAGTGAATTCATGGACGGGGCGCCGGTG    | Cloning     |
|                   | R: CGAGCTCGATGGATCCCTAGTACCGGATGTTTGG    | Cloning     |

---

|                  |                                       |         |
|------------------|---------------------------------------|---------|
| <i>OsMPK4-1</i>  | F: GGAGGCCAGTGAATTCATGGATTCCTCCTCCGGC | Cloning |
|                  | R: CGAGCTCGATGGATCCTTAGTAGGGAGGATCCGG | Cloning |
| <i>OsMPK6</i>    | F: GGAGGCCAGTGAATTCATGGACGCCGGGGCGCAG | Cloning |
|                  | R: CGAGCTCGATGGATCCCTACTGGTAATCAGGGTT | Cloning |
| <i>OsMPK14</i>   | F: GGAGGCCAGTGAATTCATGGCGATCATGGTGGAT | Cloning |
|                  | R: CGAGCTCGATGGATCCTCATCGGGCACTCATTGC | Cloning |
| <i>OsMPK16</i>   | F: GGAGGCCAGTGAATTCATGGACTTCTTTACCGAG | Cloning |
|                  | R: CGAGCTCGATGGATCCTCAGGGGTAAAGACCTCG | Cloning |
| <i>OsMPK17-1</i> | F: GGAGGCCAGTGAATTCATGGGGGAGGGGGCACG  | Cloning |
|                  | R: CGAGCTCGATGGATCCCTAGGAGTGCATCCTGGA | Cloning |
| <i>OsMPK17-2</i> | F: GGAGGCCAGTGAATTCATGGAGTCTTTACGGAA  | Cloning |
|                  | R: CGAGCTCGATGGATCCCTAGGAGAGCATCCTGGT | Cloning |
| <i>OsMPK20-3</i> | F: GGAGGCCAGTGAATTCATGCAGACCAGCAATTTT | Cloning |
|                  | R: CGAGCTCGATGGATCCCTAGGTGATTCTATACGT | Cloning |
| <i>OsMPK4-2</i>  | F: GGAGGCCAGTGAATTCATGGCGATGATGGTGGAC | Cloning |
|                  | R: CGAGCTCGATGGATCCTCACATATCACTCCTGC  | Cloning |
| <i>OsMPK21-1</i> | F: GGAGGCCAGTGAATTCATGGGCGCCGCGCCCGC  | Cloning |
|                  | R: CGAGCTCGATGGATCCTCAGGTTTTCAGTTGAGC | Cloning |
| <i>OsMPK21-2</i> | F: GGAGGCCAGTGAATTCATGGATGCTAAGAAGGGC | Cloning |
|                  | R: CGAGCTCGATGGATCCTTATGTTTTCAATTGAGC | Cloning |
| <i>OsMPK7</i>    | F: GGAGGCCAGTGAATTCATGCCTGAGGCAAATGCG | Cloning |
|                  | R: CGAGCTCGATGGATCCCTAGTACATCCTTGAAC  | Cloning |

---

---

|                            |                                         |         |
|----------------------------|-----------------------------------------|---------|
| <i>OsMPK9</i>              | F: GGAGGCCAGTGAATTCATGAGAAAGAAAGATCCAGT | Cloning |
|                            | R: CGAGCTCGATGGATCCCTAATACATCCTTGAGGTGC | Cloning |
| <i>OsMPK20-1</i>           | F: GGAGGCCAGTGAATTCATGCAGCAGGATCAGCGCAA | Cloning |
|                            | R: CGAGCTCGATGGATCCCTAATACATCCTCGACATGC | Cloning |
| <i>OsMPK20-4</i>           | F: GGAGGCCAGTGAATTCATGGCGATGCAGACGATGCA | Cloning |
|                            | R: CGAGCTCGATGGATCCCTAATACATCCTCGAGACCC | Cloning |
| <i>OsMPK7</i>              | F: GGATTCGGAATGACAAGG                   | qRT-PCR |
|                            | R: GATCAGCCAACGCCTCTT                   | qRT-PCR |
| <i>OsMPK9</i>              | F: CAGTGATGAGTTCAGGGTA                  | qRT-PCR |
|                            | R: ACTTTGCTGTTCGGATAA                   | qRT-PCR |
| <i>OsMPK20-1</i>           | F: GGTAAGGGAAGCTATGGG                   | qRT-PCR |
|                            | R: CTCCTCGATGGAGGCAAC                   | qRT-PCR |
| <i>OsMPK20-4</i>           | F: GTGCCCTTGACAAC TTTC                  | qRT-PCR |
|                            | R: CCCTCGTCCTGTTCTACC                   | qRT-PCR |
| <i>OsWRKY55</i> -<br>UTR-F | F: GATGCAGGAAGATTGGT                    | qRT-PCR |
| <i>OsWRKY55</i> -<br>UTR-R | R: CTTTGAGGGTGTAGAGGA                   | qRT-PCR |

---
